# Supplementary material for: Dissolvable Mg/Al layered double hydroxides and surfactant as an extractant for trace analysis of benzoylurea insecticides by high performance liquid chromatography
Source: Royal Society of Chemistry journal article supplement (doi:10.1039/d0ay01346c), 2020-01-01
Supplement: d0ay01346c1.pdf [file d0ay01346c1.pdf]

## Supplementary information

# **Dissolvable Mg/Al layered double hydroxides and surfactant as extractant for trace analysis of benzoylurea insecticides by high performance liquid chromatography**

Yanawath Santaladchaiyakit<sup>1,\*</sup> and Supalax Srijaranai<sup>2</sup>

<sup>1</sup>Department of Chemistry, Faculty of Engineering, Rajamangala University of Technology Isan, Khon Kaen Campus, Khon Kaen 40000, Thailand

<sup>2</sup>Materials Chemistry Research Unit, Department of Chemistry and Center of Excellence for Innovation in Chemistry, Faculty of Science, Khon Kaen University, Khon Kaen 40002, Thailand

\*Corresponding author: Tel.: +66 4333 8870 ext. 2309, 2390; Fax: +66 4333 8869

E-mail: sanyanawa@gmail.com, yanawath.sa@rmuti.ac.th (Y. Santaladchaiyakit)

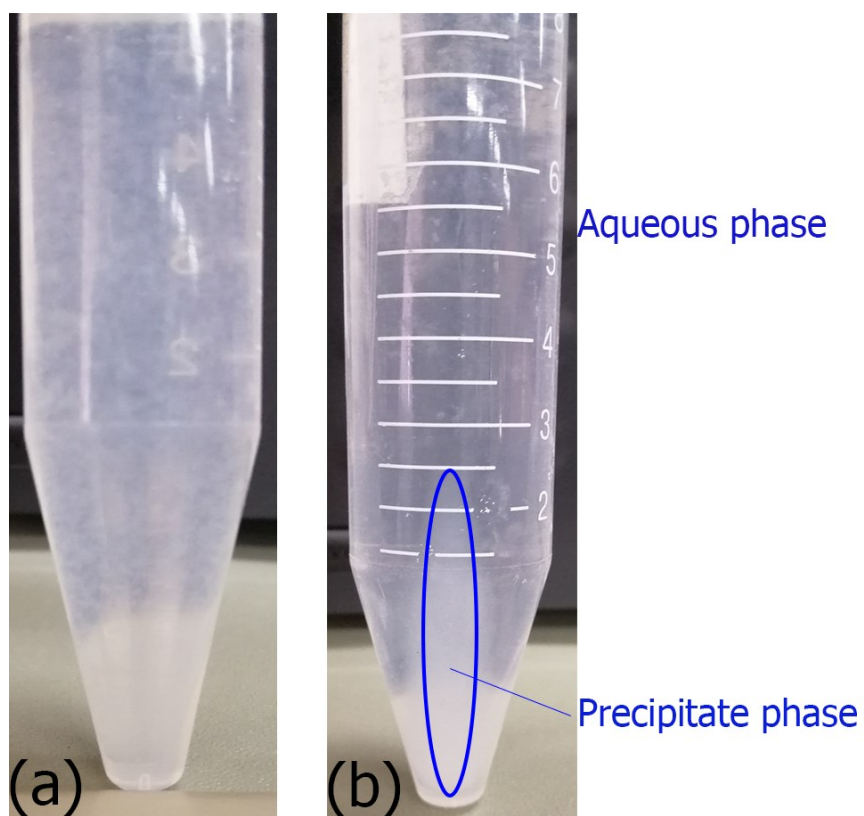

**Figure S1** The photographs of the solutions (a) during extraction and (b) after centrifugation.

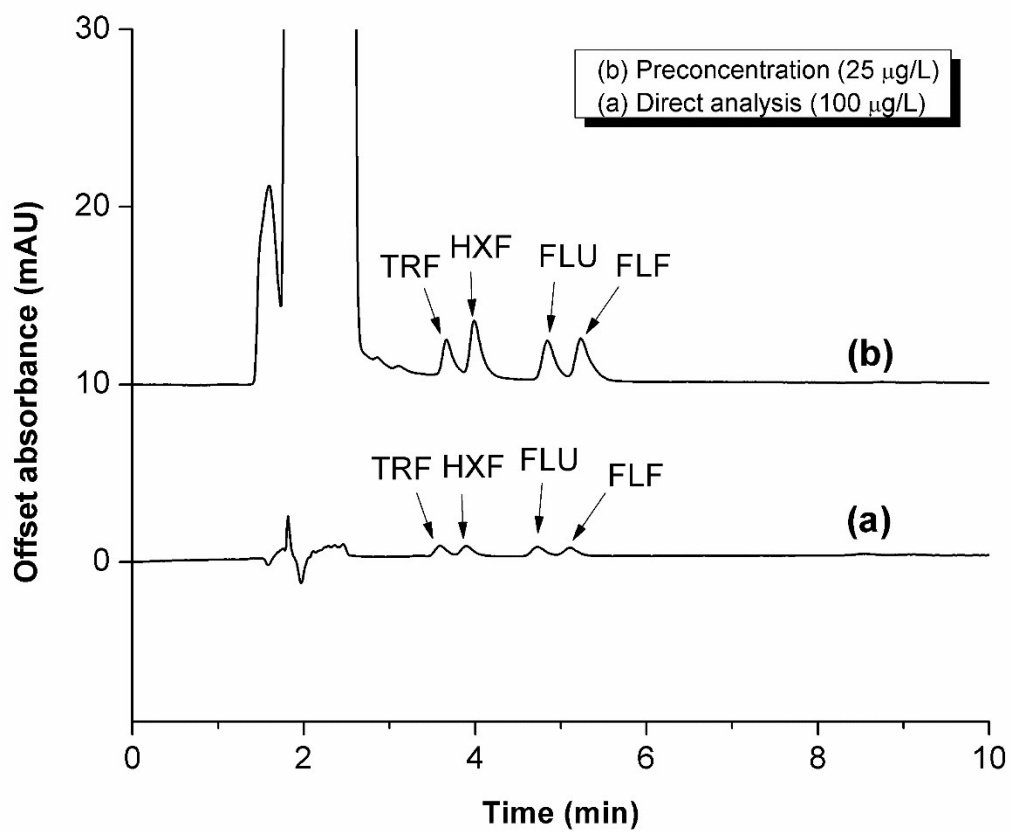

**Figure S2** Overlaid chromatograms of (a) pre-concentration of target analytes using LDHs and (b) without pre-concentration (direct analysis).
